# Supplementary material
Source: Springer Nature journal article supplement (https://www.springermedizin.de/resource/supplementary/13063_2006_149_MOESM3_ESM.pdf/9622172)

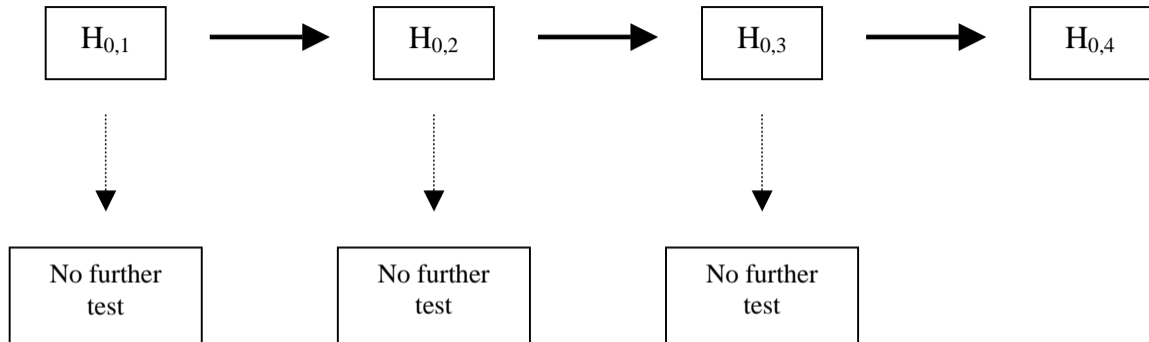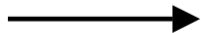

test significant

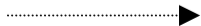

test not significant

Supplement: MOESM3 [file 9622172]
